# Supplementary material
Source: PubMed Central journal article supplement (PMC3198378)
Supplement: 1109272108_pnas.201109272SI.pdf [file 1109272108_pnas.201109272SI.pdf]

# Supporting Information

Arlt et al. 10.1073/pnas.1109272108

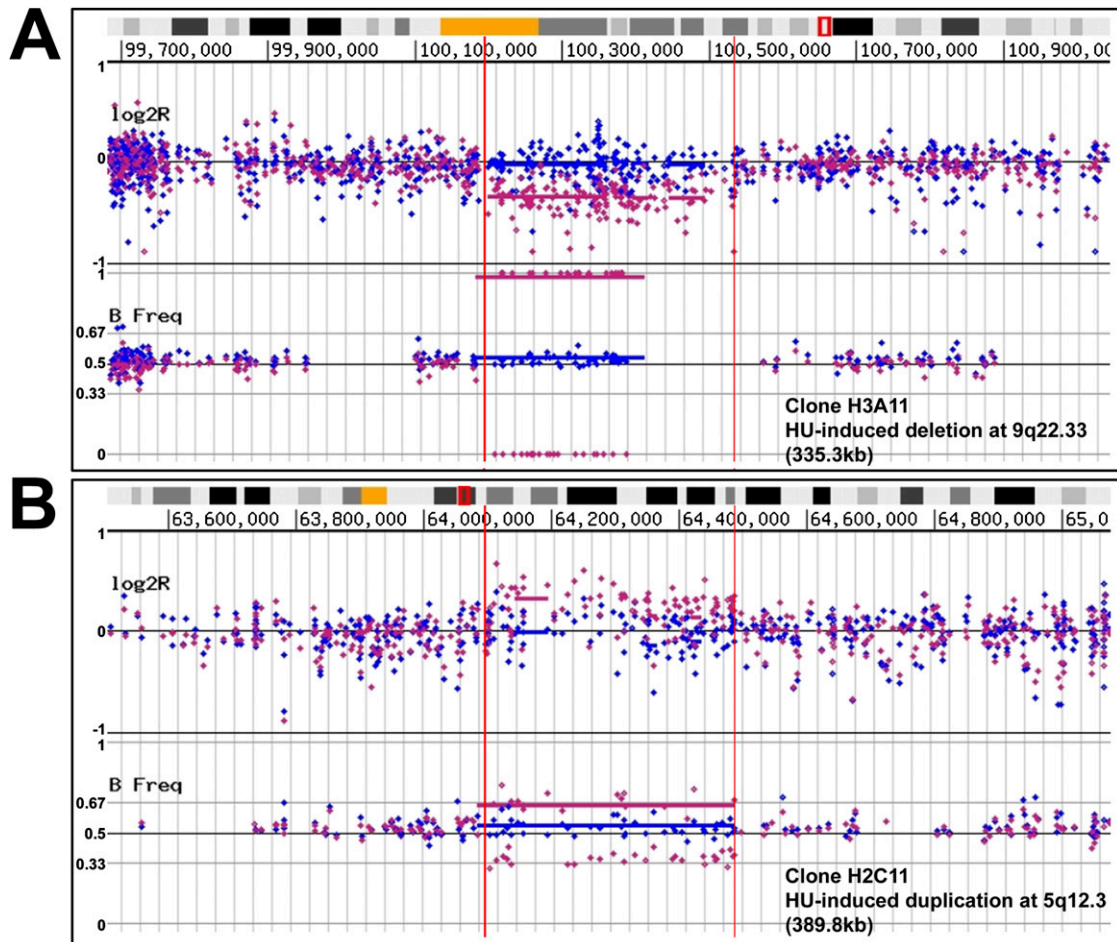

**Fig. S1.** Examples of hydroxyurea (HU)-induced copy number variants. Illumina SNP array intensity data (log<sub>2</sub>R) and B allele frequency (B Freq) are at the top and bottom of each panel, respectively. Each dot represents a single probe on the array. Blue dots represent data generated from the untreated control population. Red dots represent data from an HU-treated clone. (A) A 335.3-kb deletion at 9q22.33 in clone H3A11 is easily detected by a reduction in the log<sub>2</sub>R intensity and loss of heterozygous B allele frequencies, shifting from 0.5 to 0 or 1. (B) A 389.8-kb duplication at 5q12.3 in clone H2C11 can be identified by an increase in the log<sub>2</sub>R values and a shift in the B allele frequency from 0.5 to 0.33 or 0.67.

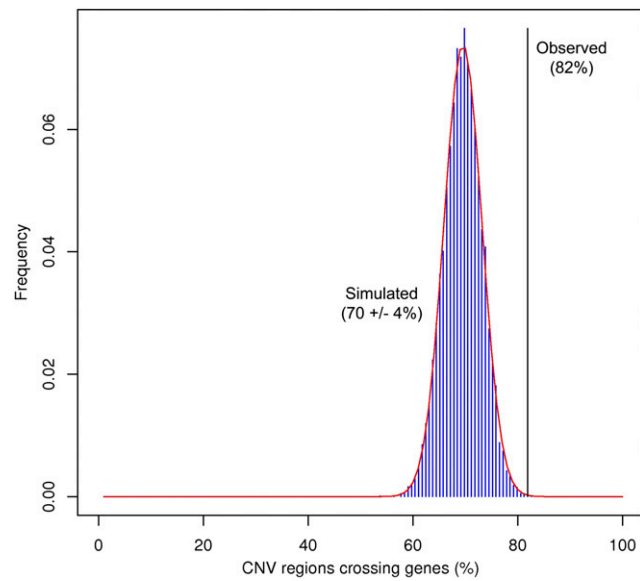

**Fig. S2.** Overlap of copy number variant (CNV) regions with genes. Histogram (blue bars) shows the frequency of iterations in a 10,000-iteration simulation that had different percentages of simulated regions crossing RefSeq genes, fitted to a Gaussian distribution (red line). Black line shows the percentage of observed copy number variant regions that overlap genes. Details and discussion in main text (*Materials and Methods*).

|                                                                                            |             |                                                                                    |             |
|--------------------------------------------------------------------------------------------|-------------|------------------------------------------------------------------------------------|-------------|
| H1A11 2p22.2 deletion<br>(100µM HU)                                                        | 36,479,534  | H2C41 12p13.33 deletion<br>(200µM HU)                                              | 1,095,921   |
| Bkpt#1 <b>CATACTTAATAAAATAGTCACGTCGTTAA</b> <u>ACTGATGATAAGTCTTACTAGTTTA</u>               |             | Bkpt#1 <b>TGGAATCTGTTAAAGTTCAGATAGCT</b> <u>CTAATTTTAAACCACAGATTATTAG</u>          |             |
| Del <b>CATACTTAATAAAATAGTCACGTCGTTAA</b> <u>ACTGATGATAAGTCTTACTAGTTTA</u>                  |             | Del <b>TGGAATCTGTTAAAGTTCAGATAGCT</b> <u>TATAGGCGTGAGCCGCTGCGCCACG</u>             |             |
| Bkpt#2 <u>TTGTGGGGCCAGGACTTAGTGT</u> <b>TTAA</b> <u>ACTGTGATAAGTCTTACTAGTTTA</u>           |             | Bkpt#2 <u>CCTCGGCCCTCCCTGAGTGTGGGAT</u> <b>TT</b> <u>TATAGGCGTGAGCCGCTGCGCCACG</u> |             |
|                                                                                            | 36,487,221  |                                                                                    | 1,463,394   |
| H2A31 3q13.31 deletion<br>(200µM HU)                                                       | 117,635,151 | H3B11 3q13.31 deletion<br>(300µM HU)                                               | 118,095,904 |
| Bkpt#1 <b>CAGTATGAATAACCCAGTTT</b> <u>AGTCAAA</u> <b>TAAATGTAAGTATATGCACATTG</b>           |             | Bkpt#1 <b>TTAATAAATCAAGTTTTCAATCAA</b> <u>AGACAAATAAAATCTGAAATACTGCAG</u>          |             |
| Del <b>CAGTATGAATAACCCAGTTT</b> <u>AGTCAAA</u> <b>TAAATGTAAGTATATGCACATTG</b>              |             | Del <b>TTAATAAATCAAGTTTTCAATCAA</b> <u>AGAAATGTCACTTACAATGTCTTAGACC</u>            |             |
| Bkpt#2 <u>GTTTTACAAGTTTCTGTCTT</u> <u>TGAGAAA</u> <u>GAACCTCCACGCTGTGT</u> <u>TACCTCT</u>  |             | Bkpt#2 <u>CAATACTAGATGAAAATTAGGCTC</u> <u>AGAAATGTCACTTACAATGTCTTAGACC</u>         |             |
|                                                                                            | 117,889,426 |                                                                                    | 118,200,900 |
| H2C41 5p15.2 deletion<br>(200µM HU)                                                        | 9,128,809   | NTB31 14q23.1 deletion<br>(NT)                                                     | 58,263,350  |
| Bkpt#1 <b>ACGGGTATCAGGGAGGTGTTGCAAA</b> <u>AGG</u> <b>AAATGAGGAAATGGGTTGATGGA</b>          |             | Bkpt#1 <b>TGTTTCAGAGGCAGAGGCTCGGCT</b> <u>GCAGTCACAAAACTAACAGAAAGAGA</u>           |             |
| Del <b>ACGGGTATCAGGGAGGTGTTGCAAA</b> <u>AGG</u> <b>AAATGAGGAAATGGGTTGATGGA</b>             |             | Del <b>TGTTTCAGAGGCAGAGGCTCGGCT</b> <u>GCATCATAACAGCATGCAGCTCCTGAC</u>             |             |
| Bkpt#2 <u>AGGCAGTCTCTGTGGCTACTGGTCA</u> <u>AGT</u> <u>TAGCTGAACAGCAGCCATAGATG</u>          |             | Bkpt#2 <u>TCTGTTTCCCACCTGTAACATGG</u> <u>GCATCATAACAGCATGCAGCTCCTGAC</u>           |             |
|                                                                                            | 9,363,325   |                                                                                    | 58,309,487  |
| H2A31 13q21.1 deletion<br>(200µM HU)                                                       | 54,416,275  | NTC21 3q13.31 deletion<br>(NT)                                                     | 117,153,488 |
| Bkpt#1 <b>CTGGAAGTCGCTCTGGGTAAGTCA</b> <u>CTG</u> <b>AGTGAAGTGGCGAGTCTTGTGAAG</b>          |             | Bkpt#1 <b>CAAAAGAAGATATACAAATGGCCA</b> <u>GCACAAATGAAAAATGCTCAACATCAC</u>          |             |
| Del <b>CTGGAAGTCGCTCTGGGTAAGTCA</b> <u>CTG</u> <b>AGTGAAGTGGCGAGTCTTGTGAAG</b>             |             | Del <b>CAAAAGAAGATATACAAATGGCCA</b> <u>GCACATGCCTGTAATCCAGCTACTTG</u>              |             |
| Bkpt#2 <u>TTTTCTTTTTTGTATATGCCTTTGT</u> <u>CTG</u> <u>TTTTTGGTATCAGGGTAATACTGG</u>         |             | Bkpt#2 <u>ATACAAAAATGGCTGGGCATGTG</u> <u>GCACATGCCTGTAATCCAGCTACTTG</u>            |             |
|                                                                                            | 54,556,077  |                                                                                    | 117,814,247 |
| H2A61 2p22.2 deletion<br>(200µM HU)                                                        | 36,506,331  | NTG51 7p15.1 deletion<br>(NT)                                                      | 31,756,287  |
| Bkpt#1 <b>TGGTGACAAATCCATTATCAGCAA</b> <u>CATT</u> <b>CTCATCAGAGGCTCAGATGAG</b>            |             | Bkpt#1 <b>AGTGGAAATTTGGAAGAATAAAG</b> <u>CAATT</u> <b>AATGTGTGTGGAGAAGGAGATA</b>   |             |
| Del <b>TGGTGACAAATCCATTATCAGCAA</b> <u>CATT</u> <b>CTCATCAGAGGCTCAGATGAG</b>               |             | Del <b>AGTGGAAATTTGGAAGAATAAAG</b> <u>CAATT</u> <b>CAAAAAGATCTCCACAGCACATT</b>     |             |
| Bkpt#2 <u>CCAGTCCATGTAGAACAATATT</u> <u>CAAA</u> <u>CATT</u> <u>GCTGCTACTTTGGCCATCACCA</u> |             | Bkpt#2 <u>GCTCAAAGATTCACAAACAGATA</u> <u>CAATT</u> <u>CAAAAAGATCTCCACAGCACATT</u>  |             |
|                                                                                            | 36,589,228  |                                                                                    | 31,874,852  |
| H2A61 18q22.1 deletion<br>(200µM HU)                                                       | 64,194,028  | NTG51 2q32.3 deletion<br>(NT)                                                      | 196,823,287 |
| Bkpt#1 <b>GAAAAGTGTTTATCATTAAATTC</b> <u>TGCA</u> <b>TTTGAACAAGTAATTTGAGTCA</b>            |             | Bkpt#1 <b>GACAGCTCTGCAAATCAGGGTTCG</b> <u>TAT</u> <b>TGTTCCAGTTGTTAATGGTTCAAAT</b> |             |
| Del <b>GAAAAGTGTTTATCATTAAATTC</b> <u>TGCA</u> <b>TTTGAACAAGTAATTTGAGTCA</b>               |             | Del <b>GACAGCTCTGCAAATCAGGGTTCG</b> <u>TAT</u> <b>ATGCTGGGAGTCTCTGGATCTTAAC</b>    |             |
| Bkpt#2 <u>TGCAATTACAATGAGCGTGAAGA</u> <u>TGCA</u> <u>GTGCTGGAATAAGTTGACTAAGT</u>           |             | Bkpt#2 <u>AGGCTCTGAAAAGGAAAGGCTCA</u> <u>TAT</u> <u>ATGCTGGGAGTCTCTGGATCTTAAC</u>  |             |
|                                                                                            | 64,220,275  |                                                                                    | 197,031,352 |
| H2B11 10q21.1 deletion<br>(200µM HU)                                                       | 53,638,925  | H1A51 3q27.3 duplication<br>(100µM HU)                                             | 189,205,577 |
| Bkpt#1 <b>TGGAGTAGGGGTCATAAACTTTT</b> <u>CTG</u> <b>CAGTGAAGCTTTGTAGTGAATAT</b>            |             | Bkpt#1 <b>TGTCAGAATGCCTGGTGGATGCCT</b> <u>GGTGGGACACCTGCCAAGGCATACAG</u>           |             |
| Del <b>TGGAGTAGGGGTCATAAACTTTT</b> <u>CTG</u> <b>CAGTGAAGCTTTGTAGTGAATAT</b>               |             | Dup <b>TGTCAGAATGCCTGGTGGATGCCT</b> <u>GGTGGGACACCTGCCAAGGCATACAG</u>              |             |
| Bkpt#2 <u>TTTAGGACCTTAGGATTGGAGGACAGGAT</u> <u>TGG</u> <u>GAAGGGGACGATTGAGTAG</u>          |             | Bkpt#2 <u>TTTTAAATAATGCCTTTTTGAGGAA</u> <u>CTAGCT</u> <u>TAGGCTCTCTATCCTGGG</u>    |             |
|                                                                                            | 53,671,033  |                                                                                    | 188,457,031 |
| H2C21 3q13.31 deletion<br>(200µM HU)                                                       | 118,084,102 | H2B41 17p12 duplication<br>(200µM HU)                                              | 14,348,849  |
| Bkpt#1 <b>TCAGTGTAATAATGAGAACTATA</b> <u>AACTCCTAGGAGAACTCCTAGGATTG</u>                    |             | Bkpt#1 <b>CCAGCCCTGGCTTCAATGCTCTGG</b> <u>TT</u> <b>CACCTCCGTCAGACTGGTCTCTCTC</b>  |             |
| Del <b>TCAGTGTAATAATGAGAACTATA</b> <u>AACTCCTAGGAGAACTCCTAGGATTG</u>                       |             | Dup <b>CCAGCCCTGGCTTCAATGCTCTGG</b> <u>TT</u> <b>TTTTTTTTTTTTTTTTTGAATTTCTAT</b>   |             |
| Bkpt#2 <u>CCTCAGTCTCCCAAAGTCTGGGAT</u> <u>TATAGACATGAGCCACCATGCCTGGC</u>                   |             | Bkpt#2 <u>AATTTTTAATGGACTTACCCTAC</u> <u>TT</u> <u>TTTTTTTTTTTTTTTTTGAATTTCTAT</u> |             |
|                                                                                            | 118,135,927 |                                                                                    | 14,349,353  |
| H2C21 7q11.22 deletion<br>(200µM HU)                                                       | 68,890,457  | NTA11 10q24.13 duplication<br>(NT)                                                 | 102,832,429 |
| Bkpt#1 <b>GCATATTTTTGAATAACCTTCACTA</b> <u>GC</u> <b>ATTATTATAGTAGTTATTTTTATT</b>          |             | Bkpt#1 <b>GTAAGGGATCTCTCCAGGTTGGA</b> <u>TTTT</u> <b>CCCAAATAGATGAGACCCTCAAT</b>   |             |
| Del <b>GCATATTTTTGAATAACCTTCACTA</b> <u>GC</u> <b>ATTATTATAGTAGTTATTTTTATT</b>             |             | Dup <b>GTAAGGGATCTCTCCAGGTTGGA</b> <u>TTTT</u> <b>TATTATTGAGTTGTATGTTCTGG</b>      |             |
| Bkpt#2 <u>ACTGTTAGAATCAATATTTTTGTG</u> <u>GAAGCCAAAGTTTATAGGTAAGGCA</u>                    |             | Bkpt#2 <u>TATTTTTGAATATAGTTATTTGTC</u> <u>TT</u> <u>TTTTATTATTGAGTTGTATGTTCTGG</u> |             |
|                                                                                            | 69,202,211  |                                                                                    | 102,710,396 |
| H2C31 7p21.3 deletion<br>(200µM HU)                                                        | 7,996,602   |                                                                                    |             |
| Bkpt#1 <b>TATTTTAGAAAATAAAGCATAATGC</b> <u>TAT</u> <b>CCTCCAATATGTTATGACACTTT</b>          |             |                                                                                    |             |
| Del <b>TATTTTAGAAAATAAAGCATAATGC</b> <u>TAT</u> <b>CCTCCAATATGTTATGACACTTT</b>             |             |                                                                                    |             |
| Bkpt#2 <u>CTAGACAGTTAAGTCTGGAGTCTG</u> <u>T</u> <u>TTCTTTAATACTGTGGATAATTGA</u>            |             |                                                                                    |             |
|                                                                                            | 8,078,982   |                                                                                    |             |

Fig. S3. Copy number variant breakpoint junctions from hydroxyurea (HU)-treated and untreated clones. Breakpoints from 12 deletions and 2 duplications from hydroxyurea-treated cells and 4 deletions and 1 duplication from untreated cells were sequenced, revealing microhomologies and blunt ends. Sequences from the left and right breakpoint regions are red and blue, respectively. Regions of perfect homology at the junction are underlined and highlighted in yellow.

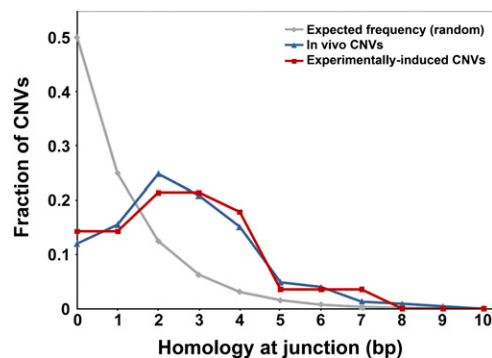

**Fig. S4.** Comparison of breakpoint sequences in hydroxyurea- and aphidicolin-induced copy number variants (CNVs) in vitro and germline CNVs in vivo. The frequencies of CNV breakpoints with 0–10 bp of microhomology are compared between all replication stress-induced CNVs from this and previous studies (red line) (1, 2) and germline CNVs seen in vivo (blue line) (3, 4). The expected frequency if microhomologous junctions occurred randomly is also shown (gray line).

1. Arlt MF, et al. (2009) Replication stress induces genome-wide copy number changes in human cells that resemble polymorphic and pathogenic variants. *Am J Hum Genet* 84:339–350.
2. Arlt MF, et al. (2011) Comparison of constitutional and replication stress-induced genome structural variation by SNP array and mate-pair sequencing. *Genetics* 187:675–683.
3. Vissers LE, et al. (2009) Rare pathogenic microdeletions and tandem duplications are microhomology-mediated and stimulated by local genomic architecture. *Hum Mol Genet* 18:3579–3593.
4. Conrad DF, et al. (2010) Mutation spectrum revealed by breakpoint sequencing of human germline CNVs. *Nat Genet* 42:385–391.

**Table S1. Monte Carlo simulation to identify copy number variant (CNV) hotspots**

| CNVs in region (N) | Observed CNVs         |      | Simulation mean         |        | $P(>0)$ | $P(R_{obs})$ |
|--------------------|-----------------------|------|-------------------------|--------|---------|--------------|
|                    | Regions ( $R_{obs}$ ) | CNVs | Regions ( $\lambda_N$ ) | CNVs   |         |              |
| 1                  | 103                   | 103  | 193                     | 193    | 1.0     | 1.0          |
| 2                  | 11                    | 22   | 6.7                     | 13.4   | 1.0     | 0.08         |
| 3                  | 5                     | 15   | 0.28                    | 0.84   | 0.2     | 0.00001      |
| 4                  | 3                     | 12   | 0.011                   | 0.044  | 0.01    | 0.0000002    |
| 6                  | 1                     | 6    | 0.0001                  | 0.0006 | 0.0001  | 0.0001       |
| 7                  | 1                     | 7    | 0                       | 0      | <0.0001 | <0.0001      |
| 11                 | 1                     | 11   | 0                       | 0      | <0.0001 | <0.0001      |
| 31                 | 1                     | 31   | 0                       | 0      | <0.0001 | <0.0001      |

Details in main text (*Materials and Methods*).

## Other Supporting Information Files

[Dataset S1 \(XLSX\)](#)
